# Supplementary material for: Multilayered gene control drives timely exit from the stem cell state in uncommitted progenitors during Drosophila asymmetric neural stem cell division
Source: PubMed Central journal article supplement — Genes Dev. 2018 Dec 1;32(23-24):1550–61. doi: 10.1101/gad.320333.118 (PMC6295162; doi:10.1101/gad.320333.118), 2018-12-01
Supplement: supp_gad.320333.118_Supplemental_Data.pdf [file supp_gad.320333.118_Supplemental_Data.pdf]

## Supplemental Figure Legends

### Figure S1. Identification of *tis11* and *pan2* alleles.

(A) Over-expressing a dominant-negative form of Mastermind (Mam<sup>DN</sup>) in immature INPs partially suppressed the supernumerary neuroblast phenotype in *numb* hypomorphic brains. Mam<sup>DN</sup> antagonizes the activation of Notch target genes. Bar graph is represented as mean  $\pm$  standard deviation. P-value: \*\*\* <0.005.

(B) Identification of the *tis11* locus as a genetic modifier of the supernumerary neuroblast phenotype in *brat* hypomorphic brains.

(C) Expression of *pan2* mRNA in wild-type or *pan2* homozygous mutant animals. *pan2*<sup>f00130</sup> (*pan2*<sup>-/-</sup>) is a null allele.

(D) Graphic illustration of the functional domains in Pan2. Asterisks correspond to the molecular lesions in enzymatically inactive Pan2<sup>D1039N,1041Q</sup> transgenic protein. UCH: ubiquitin C-terminal hydrolase.

### Figure S2. Brat likely recruits Tis11 to the BRE-ARE motif in the 3'UTRs of self-renewal gene transcripts.

(A) The 3'UTRs of *dpn* and *klu* mRNA. High-affinity BREs: darker yellow. Lower-affinity BREs: lighter yellow. AREs: red.

(B) B-boxes are required for Brat to bind Tis11. This is the reciprocal IP-WB analysis of the lysate shown in Fig. 2B.

### Figure S3. Conserved domains in Insb.

Illustration showing conserved motifs (marked in red) in Insb among 12 *Drosophila* species.

### Figure S4. The Orange motif mediates Insb binding to Dpn.

C-terminally truncated Insb lacking the Orange motif fails to bind to Dpn. The Orange motif alone is sufficient to facilitate Insb binding to Dpn.

Komori\_Supplementary\_Figure 1

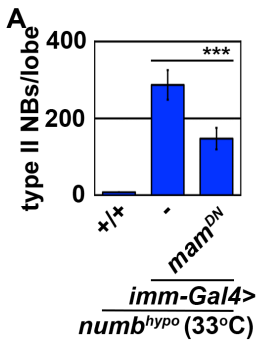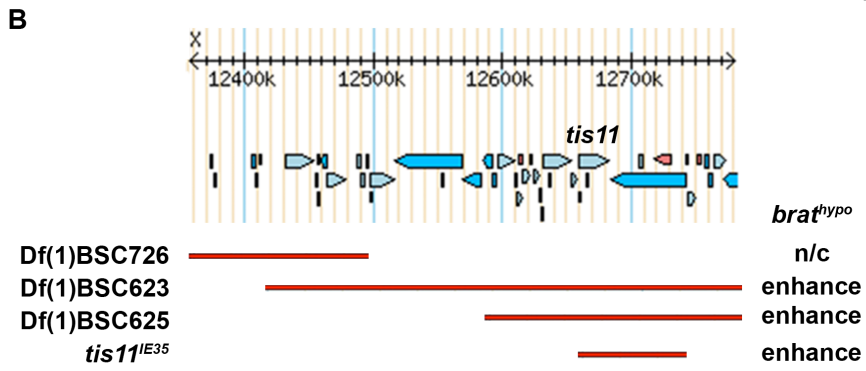

**C**

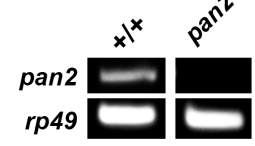

**D**

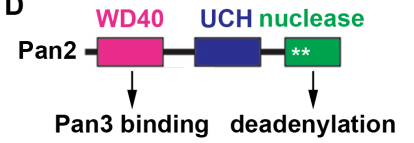

A

*dpn* 3'UTR

**BRE: U/AUGUUAU/A**

**ARE: AUUUA**

AUCAACGCA CAGGCCACUU CU**AUGUUA**CG UUUUAUC**AUU**  
**GUUUAUUUA**U UUCAUUGCA**AUUUU**UUCAAA GAUCACUUCA  
 AUGCUUUAGA ACCCAUUAU GUUUCAACGA UUUCUAU**AUG**  
**UUUUUA**UGUA UCCCCGUUC GCUUUCUUC**AUUUU**AAGUUC  
 AGCUGTG**AUU**U**GUUAU****AUUU**U**UUGUGU**AGU UCUCGUUUAA  
 GCGCUUUUA CGACUAUUUA GUAGUUCAU AAAUAAUUUA  
 GUUCUUUA**AU****GUUU**CAUUA CUGCUC**AAGU****AUUUA**AACAA  
 UUAACGUGU UUCU**AUUUA**A GUUAUGUAGU UUUCAUUGUA  
 UAGCGUUUA CAUAGGUGA UUCACGUUC UAUUUAGUG  
 UUUUA**AUUUA**ACGAUUGUA**AUUUU**AACUUU UAGGUAAUGC  
 AAAAUUCGAU GGAGUGAAAA UAAUGAUAAU AAAAAAAAAA  
 UGCUGC

*klu* 3'UTR

CGGUGUCUGU AUGCAGCAGC AUCCAGACC**AUUUA**UGACCU GUUAGGUAAA  
 AUCCAGUCCA UCCAUCUCC AUUUGACAGG CCCAGCUUAG UGCUACAGAA  
 AAAUAUCUGA AAAAAAAAAUA GAGAAAAGAA AUGAAAACAU AUUAAACUAG  
 AGCAGUUUGU ACUUGUACCG GAAUCUCUG CGAAGACUGA GGAACCUUAA  
 UACUACCUAC AGUUUAAAUA AUAGGCUAAA GAACCAUCA CUAUUUUUGU  
 AAAAGAGGAG UUAGAGGGCA GCACUCAUUA GACCACCCAA CGUAUUAGAA  
 GUUUAACUAG UUCUAGUUGC UAGAUCUUU CGCGCGUCA AUGAACCCCC  
 AGGAGUUUAG AUAGCCAGGA UCUUCGAUAC AGCUAGCAA UCCAUGUUC  
 ACACCUAGGC UAUACUACAC UAUUAUAGA UAUUAUUA UAGUAUGGG  
 UCAGAUCCA CGUCCCGAUG AUCUGAUCUC UCAGCAUUUU GAGCAACGUU  
 GAAAUUACUA AGUAGACUC GCUACUUAGG CUUCAUAGGC ACGCCGCAUU  
 GGAAAAGGCA UUACUUUUGU ACUCCUA**AUU**U**AAUUA**UU CUUA**AUUUA**U  
 UUGUAACAU ACUCAGCAGA AUGUAAACUU AUACCACAAC GAUUUGUAUU  
**AUUUA**AUUU UACCUU**AUU**AAU**AUUUA**U**UU**ACUUAGU UUUAAAGGGAU  
 GCCUGCCUAC ACAAGAACAC AAACAAAAGA CAAAGAAUUC UCCCUAGGGC  
 UCAAAAAGAA AAAAGAAACG AACGCUACAC AAAACUCAU UCUAUGGAAA  
 UCUUAAAUCU UUAUUGGAAA AGAAAGACAA AAAGAAACAA UCCUUU**UUU**  
**UGUU**CAACAA AAACACUGUU AA**AUUUA**CAU UACCUUUGUA AUUG**AUUUA**A  
 UGCUUGCUCU UCUAUUAUCU AAACUACUUU **UUGUUUU**CAU GAAUUGAAAU  
 AAAACUUUU AAGUUUUCUU UAGUUUAUA ACCAUCUGGG GAUUGGAAAC  
 ACCUCACCC CUUCCGCUC CGCAAGUGGG GACACGUUA CCCGUUUCUG  
 CCCCAGGGG UGGGAUCAC CUCACCUUUC GUGGUCGUUU AC**AUGUUUA**  
 AGUUAAGUU GUUCGUU**AUU**UAUUAUAAA AGAAUUGAAA CAAAGCCCG  
 ACUCCGAUU AUUGAUUAU AGUUCUAGC UAAACGUUA AAUAAUUUAU  
 UA**AUUU****UGU**UAUUCUAGUU GGUUAUGAU AGCACUAGU UAAAAACGUU  
 UUUCACAAA UAAAACAAA CAAAGUCUA ACAUGAUGGA CAAUGUCAUA  
 CAAAACAGA**AUUUA**AAGCC

B

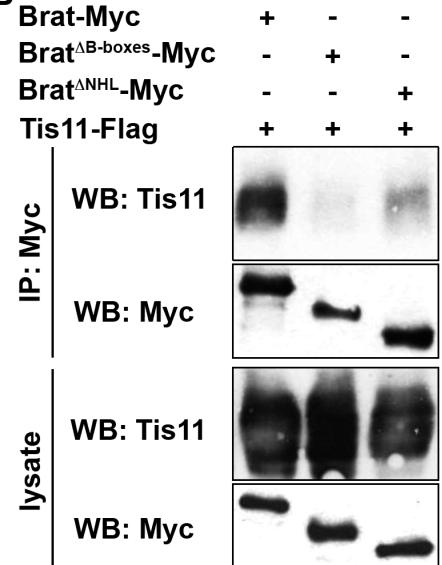

# Komori\_Supplementary\_Figure 3

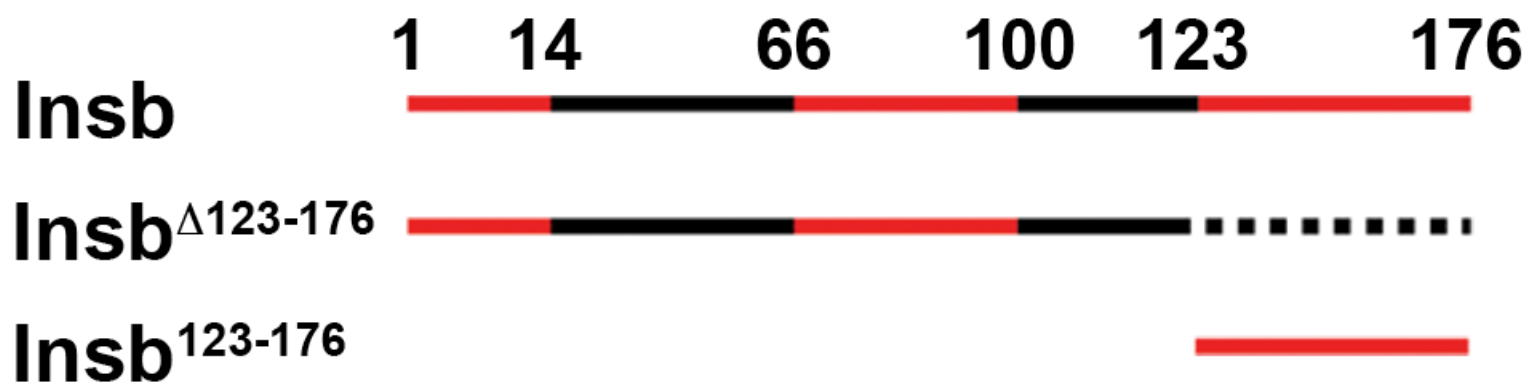

## Komori\_Supplementary\_Figure 4

|                                     |          |          |          |
|-------------------------------------|----------|----------|----------|
| <b>Insb::Myc</b>                    | <b>+</b> | <b>-</b> | <b>-</b> |
| <b>Insb<sup>Δ123-176</sup>::Myc</b> | <b>-</b> | <b>+</b> | <b>-</b> |
| <b>Insb<sup>123-176</sup>::Myc</b>  | <b>-</b> | <b>-</b> | <b>+</b> |
| <b>Dpn::Flag</b>                    | <b>+</b> | <b>+</b> | <b>+</b> |

|                                     |          |          |          |
|-------------------------------------|----------|----------|----------|
| <b>Insb::Myc</b>                    | <b>+</b> | <b>-</b> | <b>-</b> |
| <b>Insb<sup>Δ123-176</sup>::Myc</b> | <b>-</b> | <b>+</b> | <b>-</b> |
| <b>Insb<sup>123-176</sup>::Myc</b>  | <b>-</b> | <b>-</b> | <b>+</b> |
| <b>Dpn::Flag</b>                    | <b>+</b> | <b>+</b> | <b>+</b> |

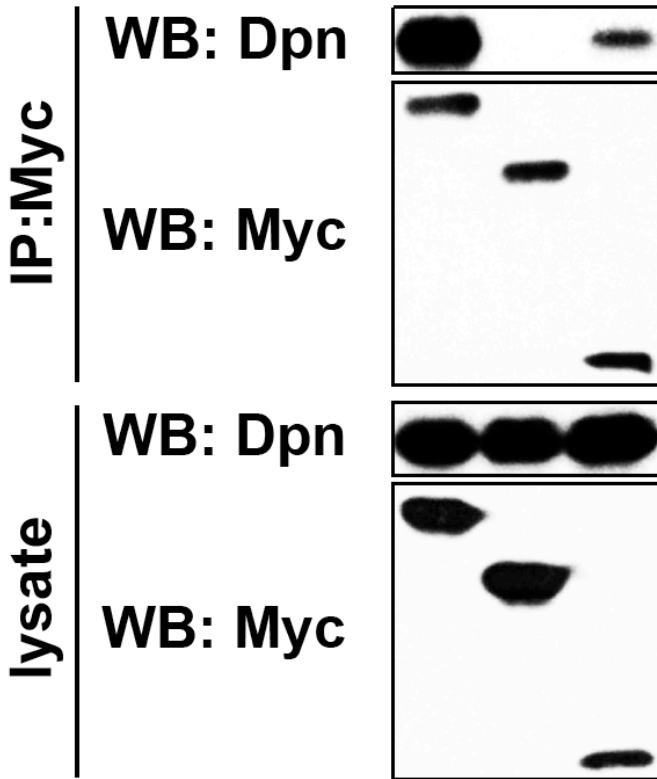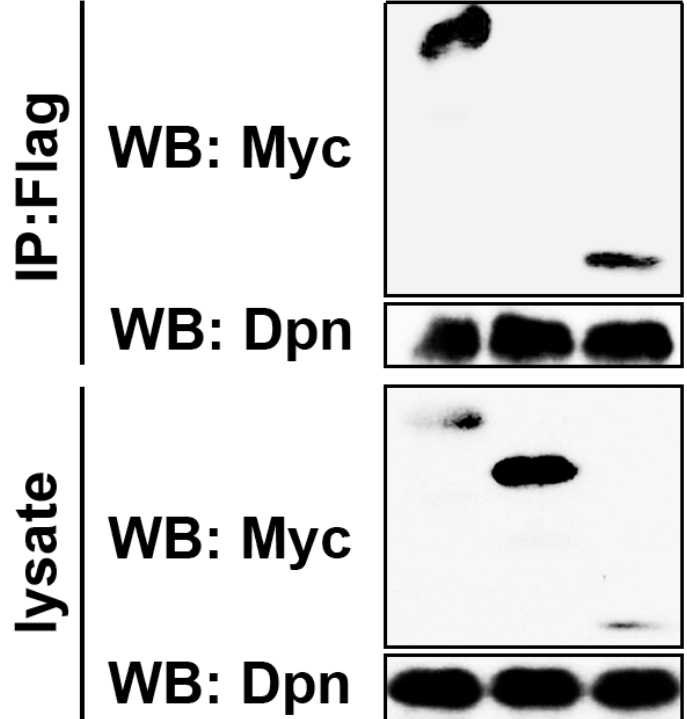

Komori Supplemental table 1

| <b>X</b>              |  | <b>Name</b>      | <b>Deleted segment</b> | <b>Sequence coordinates</b>               | <b>Phenotypic effect</b> | <b>Responsible gene</b> | <b>Reference</b>                                   |
|-----------------------|--|------------------|------------------------|-------------------------------------------|--------------------------|-------------------------|----------------------------------------------------|
| <b>BL stock #</b>     |  | Df(1)ED6565      | 2B14;2F5               | X:1894112; 2317631                        | Suppressor               | <i>arm</i>              | Komori et al., <i>Development</i> 2014             |
|                       |  | Df(1)BSC625      | 11B2;11D5              | X:12583216;12974678                       | Enhancer                 | <i>CKI α, tss11</i>     | Komori et al., <i>Development</i> 2014; this study |
|                       |  |                  |                        |                                           |                          |                         |                                                    |
|                       |  |                  |                        |                                           |                          |                         |                                                    |
| <b>2<sup>nd</sup></b> |  | <b>Symbol</b>    | <b>Deleted segment</b> | <b>Sequence coordinates</b>               | <b>Phenotypic effect</b> | <b>Responsible gene</b> | <b>Reference</b>                                   |
| <b>BL stock #</b>     |  | Df(2L)ED105      | 21E2;22A1              | 2L:852854;1420528                         | Enhancer                 | unknown                 | This study                                         |
|                       |  | Df(2L)ED94       | 21E2;21E3              | 2L:568095;1036969                         | Enhancer                 | unknown                 | This study                                         |
|                       |  | Df(2L)BSC688     | 22B1;22D6              | 2L:1736964;2273384--2273572               | Enhancer                 | <i>erm</i>              | Jenssens et al., <i>Development</i> 2014           |
|                       |  | Df(2L)BSC292     | 23F6;24A2              | 2L:3515462;3632008                        | Enhancer                 | unknown                 | This study                                         |
|                       |  | Df(2L)ED690      | 30B3;30E4              | 2L:9437469;9918174                        | Enhancer                 | <i>numb</i>             | This study                                         |
|                       |  | Df(2R)Exel7094   | 44A4;44B5              | 2R:8061165; 8131743                       | Enhancer                 | unknown                 | This study                                         |
|                       |  | Df(2R)ED1791     | 44F7;45F1              | 2R:8922730;9553252                        | Enhancer                 | <i>par2</i>             | This study                                         |
|                       |  | Df(2R)BSC408     | 45D4;45F4              | 2R:9292659;9578616                        | Enhancer                 | <i>not1</i>             | This study                                         |
|                       |  | Df(2R)BSC161     | 54B2;54B17             | 2R:17304783;17484828                      | Enhancer                 | <i>insb</i>             | This study                                         |
|                       |  | Df(2R)BSC355     | 54B16;54C3             | 2R:17462347;1753673                       | Enhancer                 | <i>insb</i>             | This study                                         |
|                       |  |                  |                        |                                           |                          |                         |                                                    |
| <b>3<sup>rd</sup></b> |  | <b>Symbol</b>    | <b>Deleted segment</b> | <b>Sequence coordinates</b>               | <b>Phenotypic effect</b> | <b>Responsible gene</b> | <b>Reference</b>                                   |
| <b>BL stock #</b>     |  | Df(3L)ED4288     | 63A6;63B7              | 3L:3070827; 3149091                       | Enhancer                 | <i>par3</i>             | This study                                         |
|                       |  | Df(3L)BSC377     | 67E5;68A4              | 3L:10654713--10654743; 11070652           | Suppressor               | <i>klv</i>              | Xiao et al., <i>Development</i> 2012               |
|                       |  | Df(3L)BSC574     | 68F1;68F1              |                                           | Enhancer                 | <i>pop2</i>             | This study                                         |
|                       |  | Df(3L)brm11      | 71F1-4;72D1-10         |                                           | Enhancer                 | <i>brm</i>              | Jenssens et al., <i>Development</i> 2014           |
|                       |  | Df(3R)Exel7327   | 89A8;89B1 (DF)         | 3R:15901433--15901434; 16041562           | Enhancer                 | <i>mor</i>              | Jenssens et al., <i>Development</i> 2014           |
|                       |  | Df(3R)DG2        | 89E1-1;4;91B1-B2       |                                           | Enhancer                 | <i>osa</i>              | Jenssens et al., <i>Development</i> 2014           |
|                       |  | Df(3R)BSC56      | 94E1-2;94F1-2          |                                           | Enhancer                 | <i>pppp1</i>            | Komori et al., <i>Development</i> 2014             |
|                       |  | Df(3R)Exel9012   | 94E9;94E13             | 3R:23279758; 23346387                     | Enhancer                 | <i>pnlp1</i>            | Komori et al., <i>Development</i> 2014             |
|                       |  | Df(3R)crib-F89-4 | 95D7-D11;95F15         |                                           | Enhancer                 | <i>apc2</i>             | Komori et al., <i>Development</i> 2014             |
|                       |  | Df(3R)ITP        | 97A;98A1-2             | 3R:26059954--26078012; 27388608--27480200 | Suppressor               | unknown                 | This study                                         |
|                       |  | Df(3R)3450       | 98I3;99A6-8            |                                           | Suppressor               | unknown                 | This study                                         |
|                       |  | Df(3R)1127       | 99B5;6;99F1            | 3R:29468941--29565244; 30387804--30458521 | Enhancer                 | <i>Akn</i>              | Komori et al., <i>Development</i> 2014             |
